# Supplementary material for: Hexamethylenetetramine-based ionic liquid/MIL-101(Cr) metal–organic framework composite: a novel and versatile tool for the preparation of pyrido[2,3-d:5,6-d′]dipyrimidines
Source: Royal Society of Chemistry journal article supplement (doi:10.1039/d0ra09054a), 2020-12-23
Supplement: d0ra09054a1.pdf [file d0ra09054a1.pdf]

## *Supplementary Materials*

### **Hexamethylenetetramine-based ionic liquid/MIL-101(Cr) metal-organic framework composite: A novel and versatile tool for the preparation of pyrido[2,3-d:5,6-d']dipyrimidines**

Boshra Mirhosseini-Eshkevari <sup>a,b</sup>, Mohammad Ali Ghasemzadeh\*<sup>b</sup>,

Manzarbanoo Esnaashari \*<sup>a</sup>, Saeed Taghvaei Ganjali <sup>a</sup>

*<sup>a</sup>Department of Chemistry, North Tehran Branch, Islamic Azad University, Tehran, I. R. Iran*

*Post Box: 1913674711, I. R. Iran.*

*<sup>b</sup>Department of Chemistry, Qom Branch, Islamic Azad University, Qom, I. R. Iran*

*Post Box: 37491-13191, I. R. Iran.*

*Corresponding author E-mail addresses: Ghasemzadeh@qom-iau.ac.ir; Mb\_esnaashari@yahoo.com*

*Tel/Fax.: +98-253-7780001*

**5-(5-bromo-2-hydroxyphenyl)-7,9-dimethyl-8-thioxo-5,8,9,10-tetrahydropyrido[2,3-d:6,5-d']dipyrimidine-2,4,6(1H,3H,7H)-trione (4o):** White solid; mp: >300 °C. <sup>1</sup>H NMR (250 MHz, DMSO-*d*<sub>6</sub>) δ: 3.01 (s, 3H, CH<sub>3</sub>), 3.66 (s, 3H, CH<sub>3</sub>), 4.22 (s, 1H, CH), 6.96- 6.99 (d, 1H, J=7.4 Hz, ArH), 7.07 (s, 1H, ArH), 7.30-7.33 (d, 1H, J=7.8 Hz, ArH), 9.27 (s, 1H, OH), 10.40 (s, 1H, NH), 10.64 (s, 1H, NH), 11.58 (s, 1H, NH) ; <sup>13</sup>C NMR (62.9 MHz, DMSO-*d*<sub>6</sub>) δ: 27.49, 31.76, 50.39, 82.52, 97.14, 114.97, 118.79, 123.66, 129.29, 131.61, 135.34, 146.33, 150.33, 151.57, 152.85, 157.33, 162.33. FT-IR (KBr): 3365, 3172, 3051, 1705, 1674, 1591 cm<sup>-1</sup>; Anal. Calcd. For C<sub>17</sub>H<sub>14</sub>BrN<sub>5</sub>O<sub>4</sub>S: C 50.80, H 3.62, Br 7.50, N 17.77, O 13.53, S 6.78. Found C 50.76, H 3.61, Br 7.53, N 17.74, O 13.46, S 6.64.; MS (EI) (m/z): 462.99 (M<sup>+</sup>).

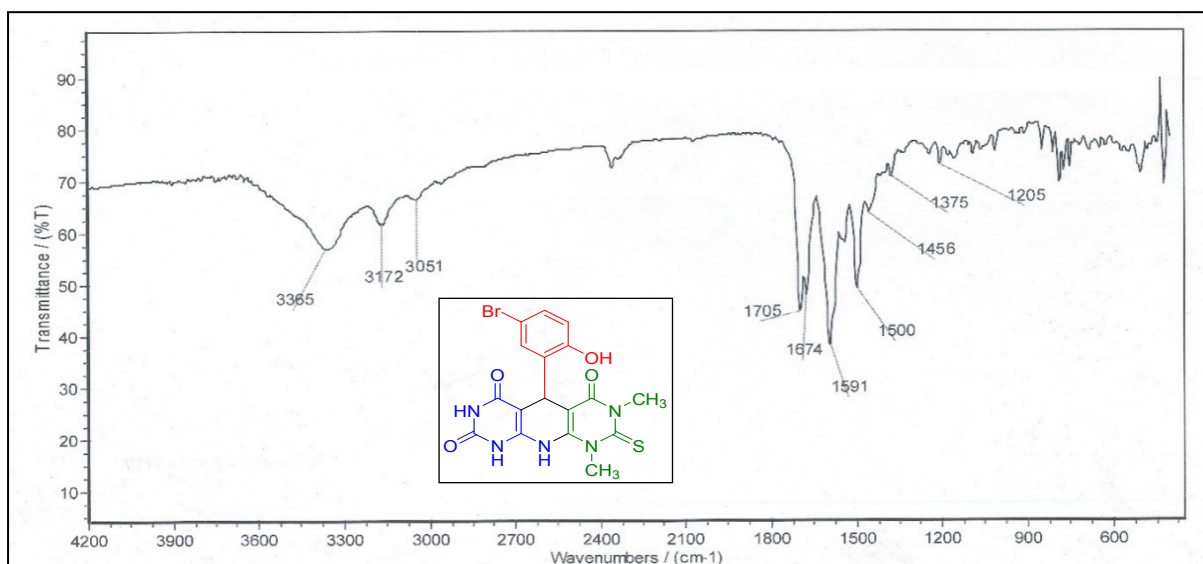

**Figure S1:** FT-IR spectra of 4o.

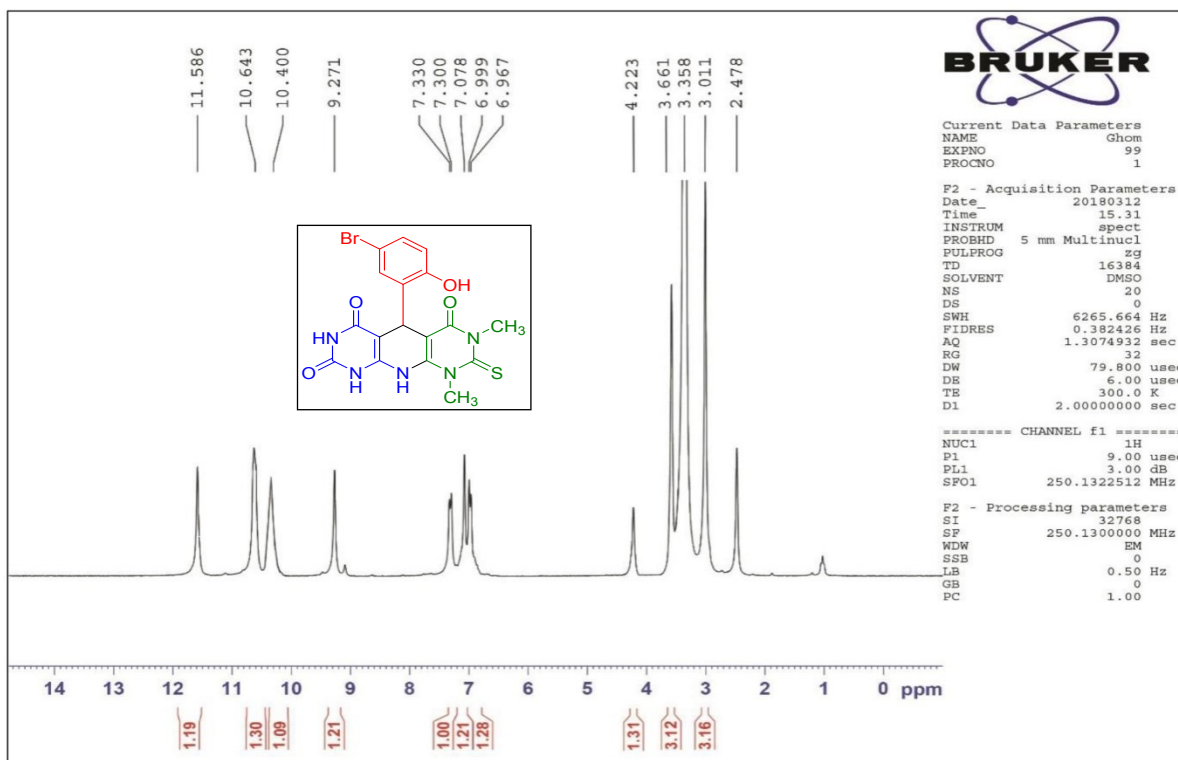

Figure S2: <sup>1</sup>H-NMR spectra of 4o.

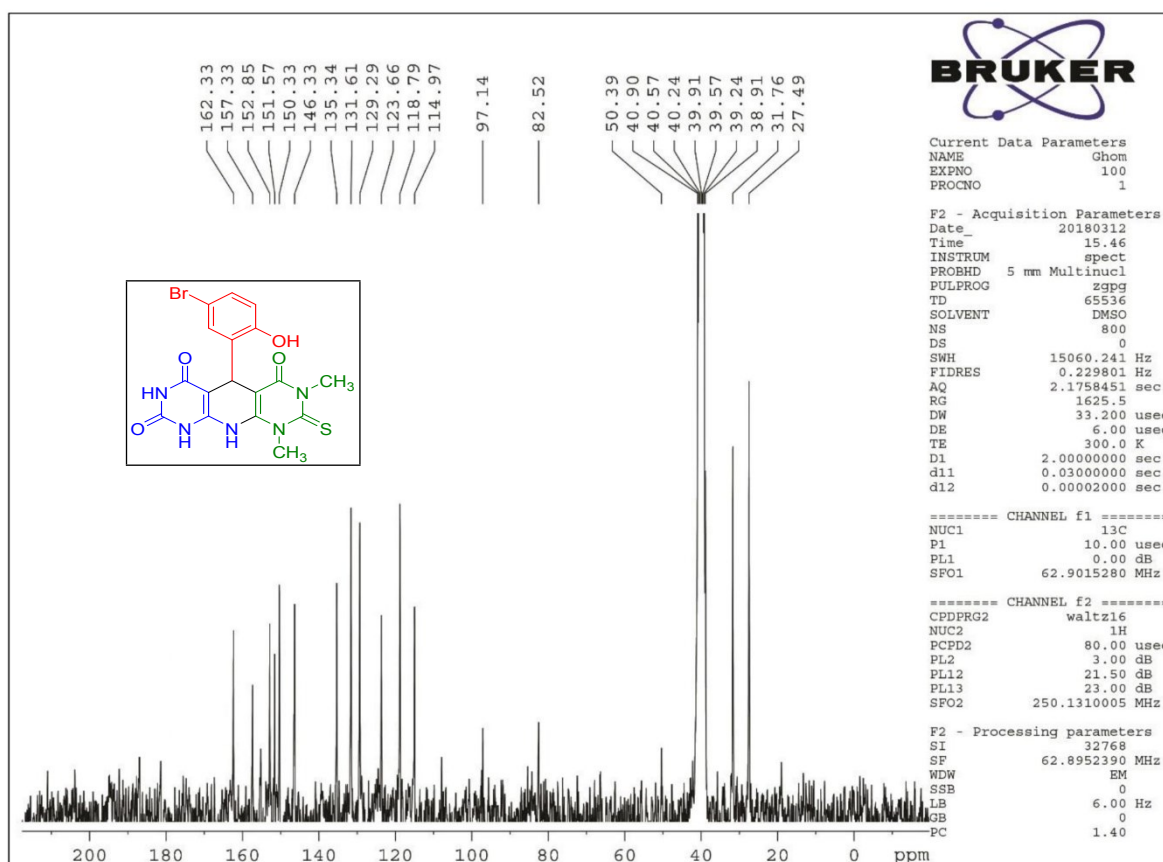

Figure S3: <sup>13</sup>C-NMR spectra of 4o.

**5-(2-hydroxy-5-nitrophenyl)-1,3-dimethyl-8-thioxo-5,8,9,10-tetrahydropyrido[2,3-d:6,5-d']dipyrimidine-2,4,6(1H,3H,7H)-trione (4p):** White solid; mp: >300 °C. <sup>1</sup>H NMR (250 MHz, DMSO-*d*<sub>6</sub>) δ: 3.09 (s, 3H, CH<sub>3</sub>), 3.22 (s, 3H, CH<sub>3</sub>), 4.13 (s, 1H, CH), 6.73 (d, 1H, J=7.4 Hz, ArH), 7.11(d, 1H, J=7.7 Hz, ArH), 7.19 (d, 1H, J=7.8 Hz, ArH), 9.12 (s, 1H, OH); 9.18 (s, 1H, NH), 10.28 (s, 1H, NH), 11.12 (s, 1H, NH); <sup>13</sup>C NMR (62.9 MHz, DMSO-*d*<sub>6</sub>) δ: 27.64, 33.24, 50.53, 82.52, 97.68, 116.51, 121.32, 123.53, 126.94, 128.65, 135.82, 146.86, 150.74, 151.57, 152.43, 157.24, 162.45. FT-IR (KBr): 3456, 3444, 3107, 2951, 1693, 1668, 1597cm<sup>-1</sup>; Anal. Calcd. For C<sub>17</sub>H<sub>14</sub>N<sub>6</sub>O<sub>6</sub>S: C 47.44, H 3.28, N 19.53, O 22.30, S 7.45. Found C 47.42, H 3.31, N 19.51, O 22.32, S 7.42.; MS (EI) (m/z): 430.07 (M<sup>+</sup>).

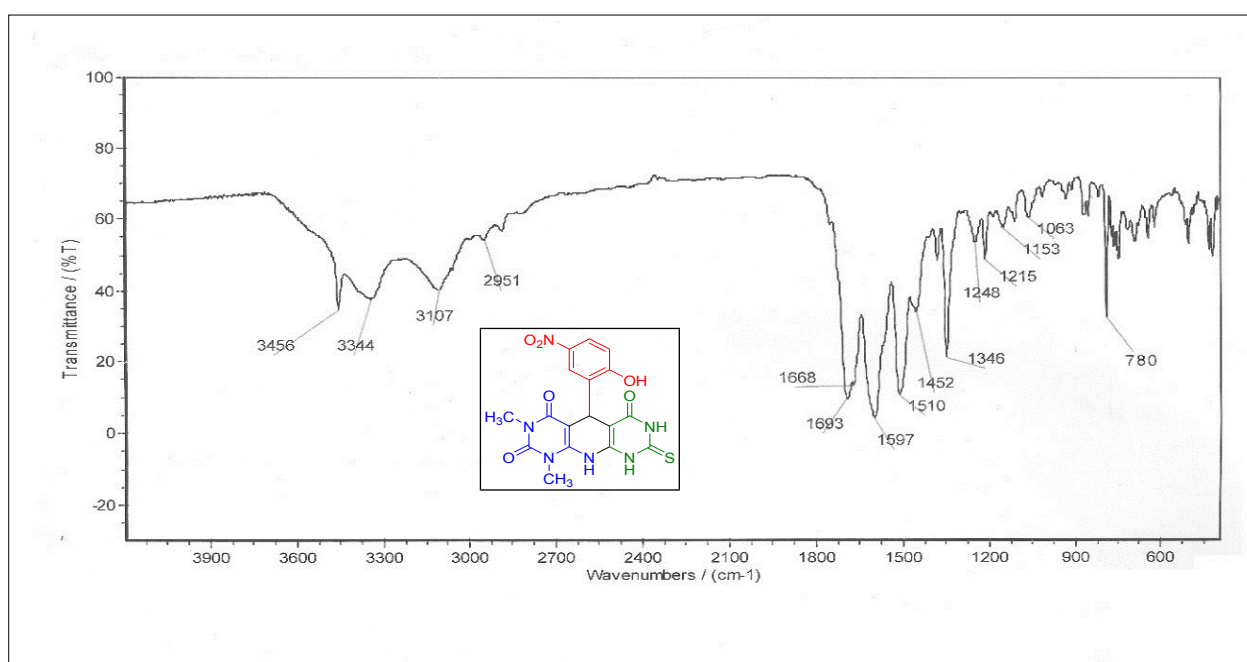

**Figure S4:** FT-IR spectra of 4p.

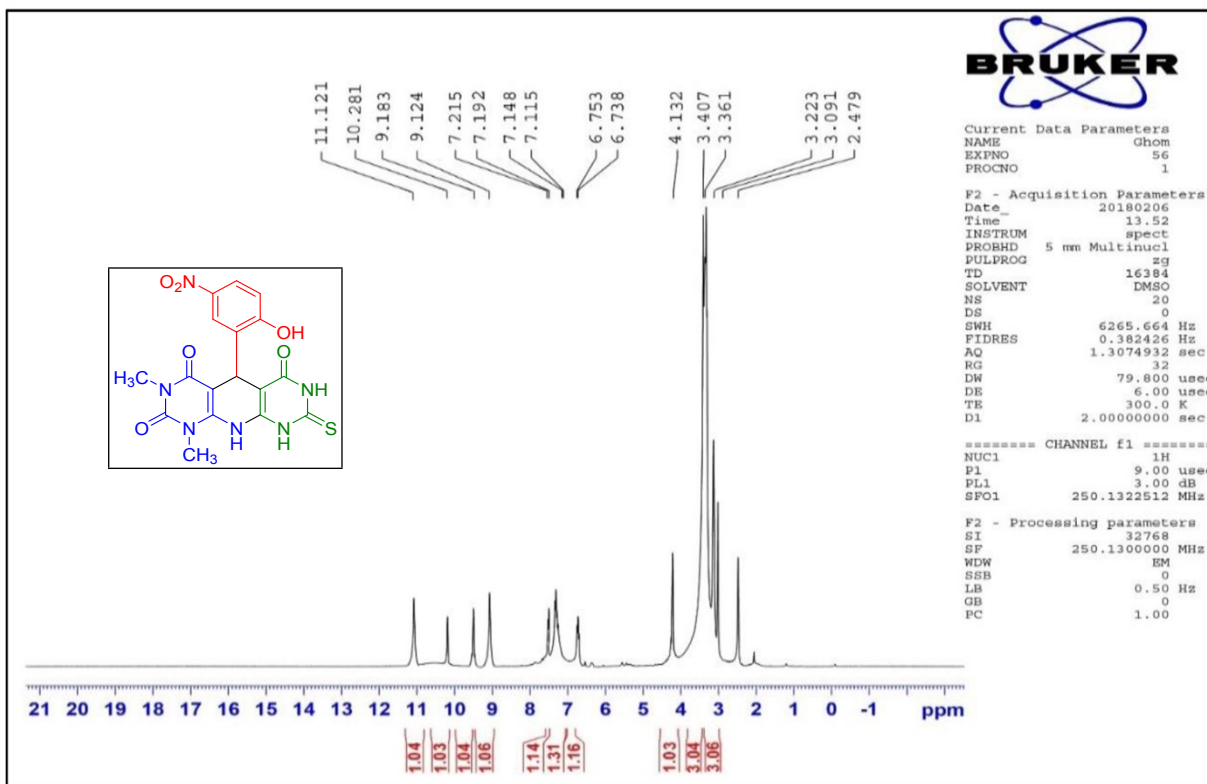

Figure S5:  $^1\text{H}$ -NMR spectra of 4p.

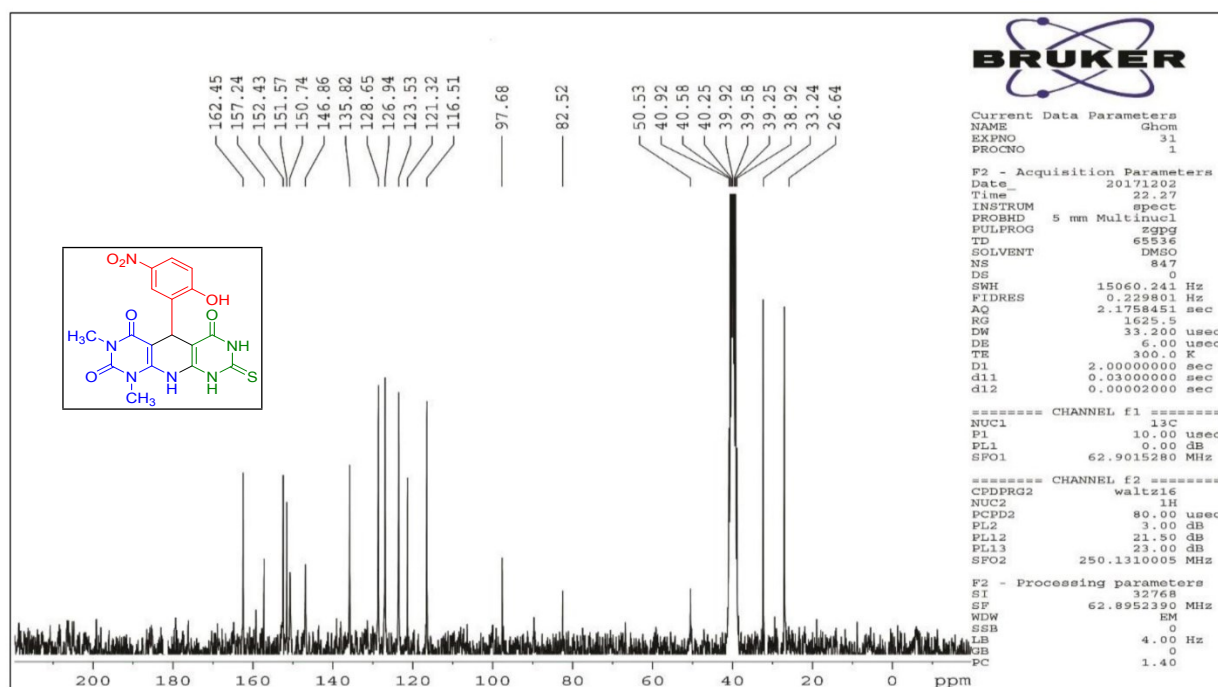

Figure S6:  $^{13}\text{C}$ -NMR spectra of 4p.
